# Supplementary material for: Tunable design of layered CuCo2O4 nanosheets@MnO2 nanoflakes core–shell arrays on Ni foam for high-performance supercapacitors
Source: Royal Society of Chemistry journal article supplement (doi:10.1039/c5ta05957g), 2015-01-01
Supplement: c5ta05957g1.pdf [file c5ta05957g1.pdf]

SI-1 SAED pattern of  $\text{CuCo}_2\text{O}_4$  nanosheets.

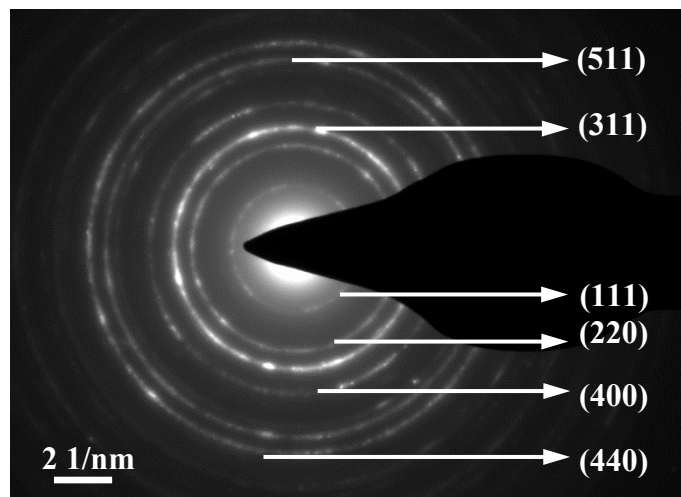

**SI-2** Typical SEM image (a) and the corresponding EDS mapping (b-g) of  $\text{CuCo}_2\text{O}_4@\text{MnO}_2$  core-shell nanostructures grown on Ni foam.

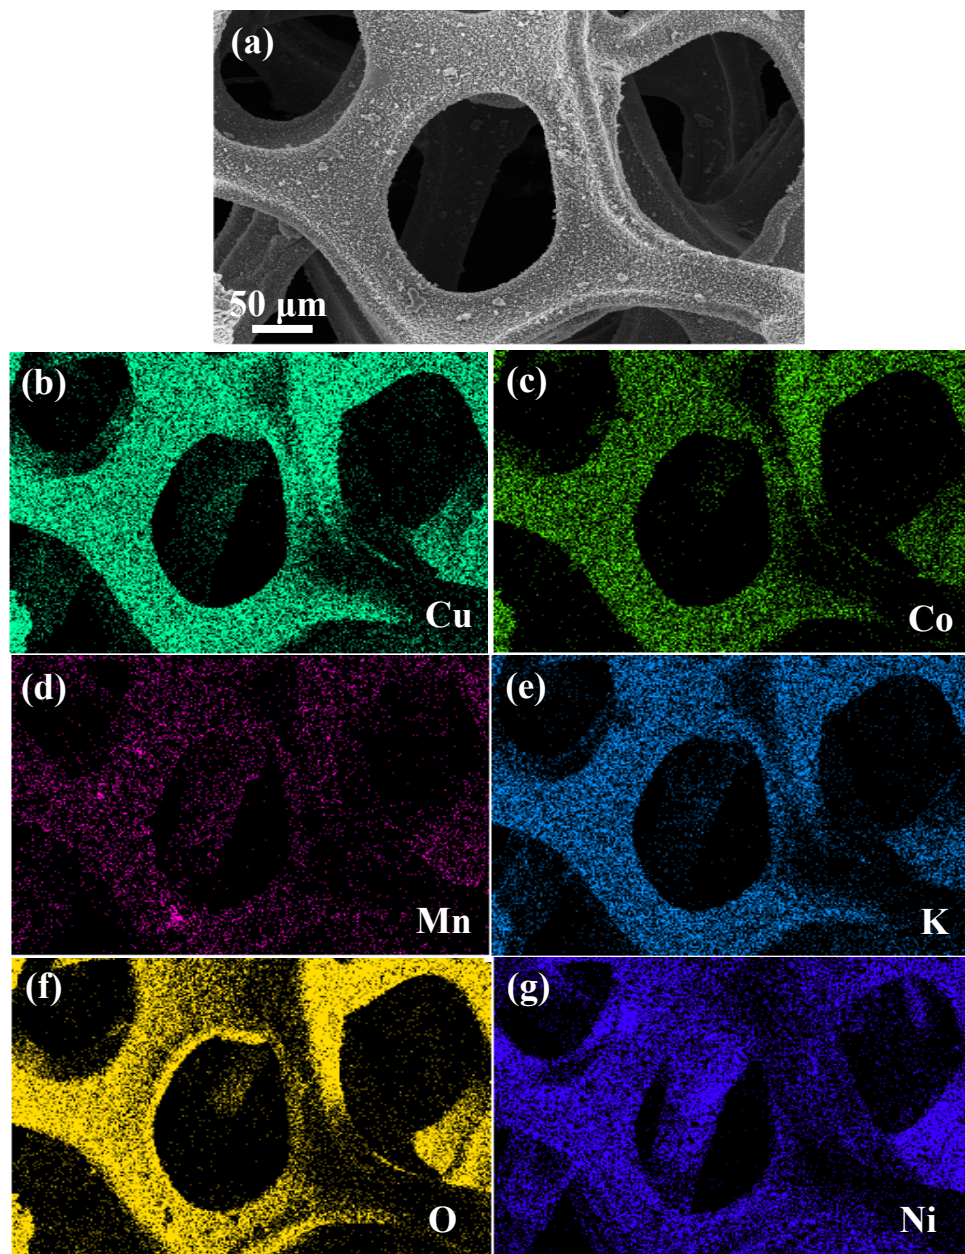

SI-3 Cyclic voltammograms of the  $\text{CuCo}_2\text{O}_4$  and  $\text{CuCo}_2\text{O}_4@\text{MnO}_2$  arrays at scan rate of  $40 \text{ mV s}^{-1}$ .

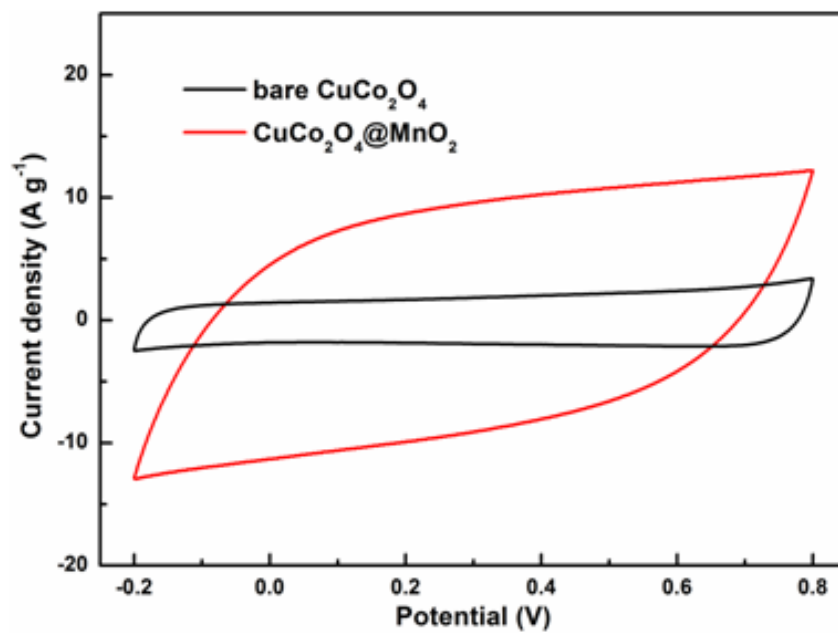

SI-4 CV (a) and GCD (b) curves of  $\text{CuCo}_2\text{O}_4@\text{MnO}_2$  NSCs electrode in 2 M KOH aqueous electrolyte.

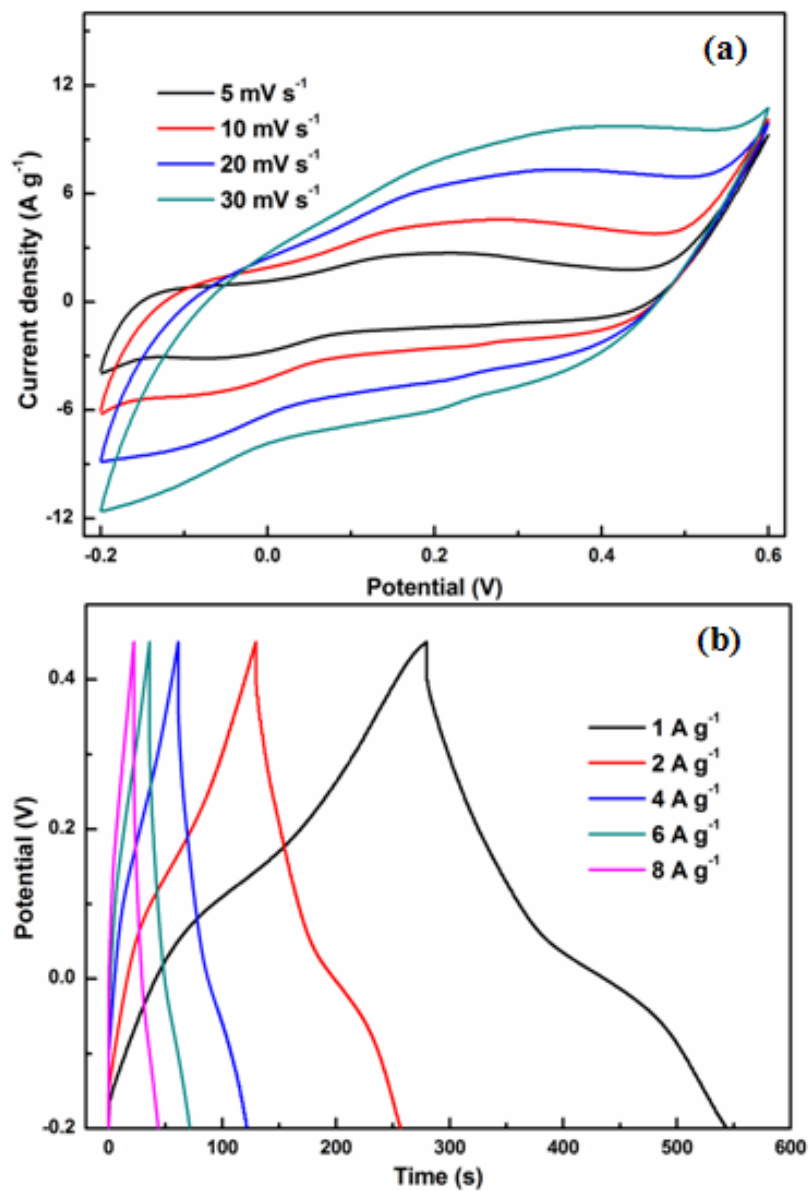

**Table S1.** Comparison of specific capacitances of the reported MnO<sub>2</sub>- and CuCo<sub>2</sub>O<sub>4</sub>-based electrodes and the present work. All values are measured using the three-electrode system.

| Samples                                                       | Cs (F g <sup>-1</sup> ) | Electrolyte                           | Test condition         | References |
|---------------------------------------------------------------|-------------------------|---------------------------------------|------------------------|------------|
| MnO <sub>2</sub> -modified diatomites                         | 202.6                   | 1 M Na <sub>2</sub> SO <sub>4</sub>   | 0.25 A g <sup>-1</sup> | [1]        |
| MnO <sub>2</sub> /activated carbon                            | 228                     | 1 M Et4NBF4                           | 10 mV s <sup>-1</sup>  | [2]        |
| MnO <sub>2</sub> -graphene composites                         | 234.2                   | 0.5 M Na <sub>2</sub> SO <sub>4</sub> | 10 mV s <sup>-1</sup>  | [3]        |
| MnO <sub>2</sub> -CNT-graphene-Ni foam                        | 251                     | 1 M Li <sub>2</sub> SO <sub>4</sub>   | 1 A g <sup>-1</sup>    | [4]        |
| RGO/MnO <sub>2</sub>                                          | 260                     | 1 M Na <sub>2</sub> SO <sub>4</sub>   | 0.3 A g <sup>-1</sup>  | [5]        |
| graphene/MnO <sub>2</sub> /polyaniline                        | 276                     | 1 M Na <sub>2</sub> SO <sub>4</sub>   | 1 A g <sup>-1</sup>    | [6]        |
| MnO <sub>2</sub> -graphene                                    | 315                     | 1 M Na <sub>2</sub> SO <sub>4</sub>   | 0.2 A g <sup>-1</sup>  | [7]        |
| MnO <sub>2</sub> /graphene                                    | 324                     | 1 M Na <sub>2</sub> SO <sub>4</sub>   | 10 mV s <sup>-1</sup>  | [8]        |
| CuCo <sub>2</sub> O <sub>4</sub> @MnO <sub>2</sub> nanowires  | 327                     | 1 M Na <sub>2</sub> SO <sub>4</sub>   | 1.25 A g <sup>-1</sup> | [9]        |
| MnO <sub>2</sub> /graphene                                    | 327.5                   | 1 M Na <sub>2</sub> SO <sub>4</sub>   | 10 mV s <sup>-1</sup>  | [10]       |
| CuCo <sub>2</sub> O <sub>4</sub> nanostructures               | 338                     | 1 M KOH                               | 1 A g <sup>-1</sup>    | [11]       |
| Ni(OH) <sub>2</sub> /MnO <sub>2</sub>                         | 355                     | 1 M Na <sub>2</sub> SO <sub>4</sub>   | 0.5 A g <sup>-1</sup>  | [12]       |
| MnO <sub>2</sub> /Ni/graphite                                 | 428                     | 0.5 M Na <sub>2</sub> SO <sub>4</sub> | 100 mV s <sup>-1</sup> | [13]       |
| TiO <sub>2</sub> @MnO <sub>2</sub>                            | 454.2                   | 1 M Na <sub>2</sub> SO <sub>4</sub>   | 0.2 A g <sup>-1</sup>  | [14]       |
| MnO <sub>2</sub> /porous carbon microspheres                  | 459                     | 6 M KOH                               | 1 A g <sup>-1</sup>    | [15]       |
| Ni(OH) <sub>2</sub> /MnO <sub>2</sub>                         | 487.4                   | 1 M KOH                               | 0.5 A g <sup>-1</sup>  | [12]       |
| CuCo <sub>2</sub> O <sub>4</sub> @MnO <sub>2</sub> nanosheets | 416                     | 1 M Na <sub>2</sub> SO <sub>4</sub>   | 1 A g <sup>-1</sup>    | This work  |

SI-5 GCD curves of the  $\text{CuCo}_2\text{O}_4@\text{MnO}_2$  NSCs electrode (a) and AG electrode (b) in a three-electrode system in a 1M  $\text{NaSO}_4$  electrolyte at a current density  $1 \text{ A g}^{-1}$ .

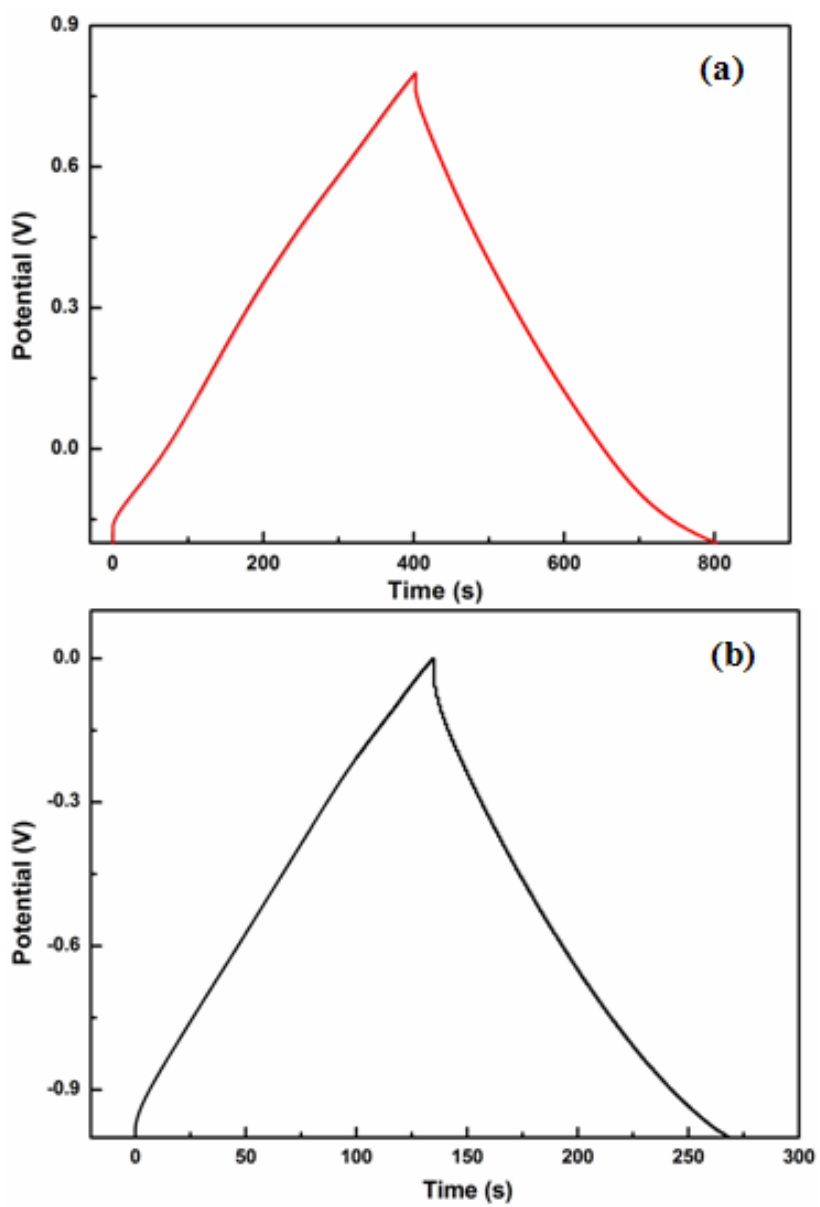

## References

- [1] Y. X. Zhang, M. Huang, F. Li, X. L. Wang, Z. Q. Wen, *J. Power Sources* 246 (2014) 449-456.
- [2] H.-Q. Wang, Z.-S. Li, Y.-G. Huang, Q.-Y. Li, X.-Y. Wang, *J. Mater. Chem.* 20 (2010) 3883-3889.
- [3] T. Zhai, F. Wang, M. Yu, S. Xie, C. Liang, C. Li, F. Xiao, R. Tang, Q. Wu, X. Lu, Y. Tong, *Nanoscale* 5 (2013) 6790-6796.
- [4] G. Zhu, Z. He, J. Chen, J. Zhao, X. Feng, Y. Ma, Q. Fan, L. Wang, W. Huang, *Nanoscale* 6 (2014) 1079-1085.
- [5] J. Zhang, X. S. Zhao, *Carbon* 52 (2013) 1-9.
- [6] G. Wang, Q. Tang, H. Bao, X. Li, G. Wang, *J. Power Sources* 241 (2013) 231-238.
- [7] Y. Liu, D. Yan, R. Zhuo, S. Li, Z. Wu, J. Wang, P. Ren, P. Yan, Z. Geng, *J. Power Sources* 242 (2013) 78-85.
- [8] Y. Qian, S. Lu, F. Gao, *J. Mater. Sci.* 46 (2011) 3517-3522.
- [9] Q. Wang, J. Xu, X. Wang, B. Liu, X. Hou, G. Yu, P. Wang, D. Chen, G. Shen, *ChemElectroChem* 1 (2014) 559-564.
- [10] M. Kim, Y. Hwang, J. Kim, *J. Mater. Sci.* 48 (2013) 7652-7663.
- [11] A. Pendashteh, M. S. Rahmanifar, R. B. Kaner, M. F. Mousavi, *Chem. Commun.* 50 (2014) 1972-1975.
- [12] H. Jiang, C. Li, T. Sun, J. Ma, *Chem. Commun.* 48 (2012) 2606-2608.
- [13] J.-X. Feng, Q. Li, X.-F. Lu, Y.-X. Tong, G.-R. Li, *J. Mater. Chem. A2* (2014) 2985-2992.
- [14] Y. Luo, D. Kong, J. Luo, S. Chen, D. Zhang, K. Qiu, X. Qi, H. Zhang, C. M. Li, T. Yu, *RSC Adv.* 3 (2013) 14413-14422.
- [15] M. Liu, L. Gan, W. Xiong, Z. Xu, D. Zhu, L. Chen, *J. Mater. Chem. A2* (2014) 2555-2562.
